# Supplementary material
Source: Springer Nature journal article supplement (https://www.springermedizin.de/resource/supplementary/12943_2013_1160_MOESM5_ESM.pdf/9552616)

# Parm-1

*Parm-1/lactin* ratio

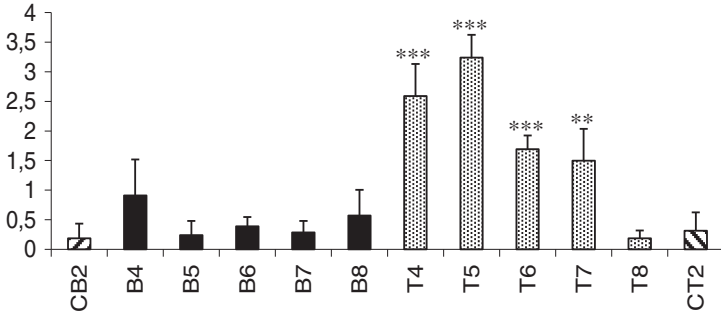

Supplement: MOESM5 [file 9552616]
